# Supplementary material for: Silencing ZIC2 abrogates tumorigenesis and anoikis resistance of non-small cell lung cancer cells by inhibiting Src/FAK signaling
Source: PubMed Central journal article supplement — Mol Ther Oncolytics. 2021 May 29;22:195–208. doi: 10.1016/j.omto.2021.05.008 (PMC8424131; doi:10.1016/j.omto.2021.05.008), 2021-05-29
Supplement: mmc1.pdf [file mmc1.pdf]

OMTO, Volume 22

## **Supplemental information**

### **Silencing ZIC2 abrogates tumorigenesis and anoikis resistance of non-small cell lung cancer cells by inhibiting Src/FAK signaling**

**Aibin Liu, Huayan Xie, Ronggang Li, Liangliang Ren, Baishuang Yang, Longxia Dai, Wenjie Lu, Baoyi Liu, Dong Ren, Xin Zhang, Qiong Chen, Yanming Huang, and Ke Shi**

SUPPLEMENTARY TABLES

**Supplementary table 1.** The basic information of 10 NSCLC patients for ZIC2 RT-qPCR and protein expression analysis.

|            |                   | Cases (n) | Percentage (%) |
|------------|-------------------|-----------|----------------|
| Histologic | LUAD <sup>a</sup> | 6         | 60             |
|            | LUSC <sup>b</sup> | 4         | 40             |
| Gender     | Male              | 7         | 70             |
|            | Female            | 3         | 30             |
| Age        | <60               | 5         | 50             |
|            | ≥60               | 5         | 50             |
| Grade      | G1                | 0         | 0              |
|            | G2                | 6         | 60             |
|            | G3                | 4         | 40             |
| Stage      | Stage I           | 2         | 20             |
|            | Stage II          | 5         | 50             |
|            | Stage III         | 3         | 30             |
|            | Stage IV          | 0         | 0              |

<sup>a</sup>LUAD: Lung adenocarcinoma; <sup>b</sup>LUSC: Lung squamous carcinoma.

**Supplementary table 2.** The basic information of 43 patients with benign human lung disease for ZIC2 in IHC analysis.

|        |        | Cases (n) | Percentage (%) |
|--------|--------|-----------|----------------|
| Gender | Male   | 33        | 76.7           |
|        | Female | 10        | 23.3           |
| Age    | <60    | 34        | 79.1           |
|        | ≥60    | 9         | 20.9           |

|                  |                       |    |      |
|------------------|-----------------------|----|------|
| Type of diseases | Amyloidosis           | 1  | 2.3  |
|                  | Fungal infection      | 2  | 4.7  |
|                  | Hamartoma             | 3  | 7.0  |
|                  | Hyperplasia           | 19 | 44.2 |
|                  | Metaplasia            | 1  | 2.3  |
|                  | Pneumonia             | 5  | 11.6 |
|                  | Pulmonary bulla       | 5  | 11.6 |
|                  | Sclerosing hemangioma | 1  | 2.3  |
|                  | Tuberculosis          | 6  | 14.0 |

**Supplementary table 3.** The basic information of 261 patients with NSCLC for ZIC2 IHC analysis.

|                  |                 | Cases (n) | Percentage (%) |
|------------------|-----------------|-----------|----------------|
| Histologic       | LUAD            | 168       | 64.4           |
|                  | LUSC            | 93        | 35.6           |
| Gender           | Female          | 107       | 41.0           |
|                  | Male            | 154       | 59.0           |
| Age              | <60             | 68        | 26.1           |
|                  | ≥60             | 193       | 73.9           |
| Grade            | G1              | 28        | 10.7           |
|                  | G2              | 128       | 49.0           |
|                  | G3              | 105       | 40.2           |
| T classification | T1              | 61        | 23.4           |
|                  | T2              | 137       | 52.5           |
|                  | T3              | 46        | 17.6           |
|                  | T4              | 13        | 5.0            |
|                  | NA <sup>a</sup> | 4         | 1.5            |
| N classification | N0              | 141       | 54.0           |

|                  |                 |     |      |
|------------------|-----------------|-----|------|
|                  | N1              | 64  | 24.5 |
|                  | N2              | 44  | 16.9 |
|                  | N3              | 2   | 0.8  |
|                  | NA <sup>a</sup> | 10  | 3.8  |
| M classification | M0              | 243 | 93.1 |
|                  | M1              | 18  | 6.9  |
| Stage            | Stage I         | 98  | 37.5 |
|                  | Stage II        | 83  | 31.8 |
|                  | Stage III       | 62  | 23.8 |
|                  | Stage IV        | 18  | 6.9  |

<sup>a</sup>NA: Not available.

**Supplementary table 4.** A list of primers used in the reactions for clone PCR.

| Gene            | Sequence (5' - 3')                                              |
|-----------------|-----------------------------------------------------------------|
| ZIC2-sh#1-up    | CCGGCGGAAGCACATGAAGGTCCATCTCGAGATGGA<br>CCTTCATGTGCTTCCGTTTTTG  |
| ZIC2-sh#1-dn    | AATTCAAAAACGGAAGCACATGAAGGTCCATCTCGA<br>GATGGACCTTCATGTGCTTCCG  |
| ZIC2-sh#2-up    | CCGGGCAACTGAGCAATCCCAAGAACTCGAGTTCTTG<br>GGATTGCTCAGTTGCTTTTTTG |
| ZIC2-sh#2-dn    | AATTCAAAAAGCAACTGAGCAATCCCAAGAACTCGA<br>GTTCTTGGGATTGCTCAGTTGC  |
| SRC-promoter-up | gccGGTACCgccCAGTTTATCACCGCAAGAGC                                |
| SRC-promoter-dn | gccAGATCTGCATCTACTACACGCCAAGC                                   |

**Supplementary table 5.** A list of primers used in the reactions for RT-qPCR.

| Gene name    | Sequence (5' - 3')   |
|--------------|----------------------|
| ZIC2 forward | GCGCAACTCCACAACCAGTA |

|       |         |                         |
|-------|---------|-------------------------|
|       | reverse | TGCCGCATATAGCGGAAAAAG   |
| SRC   | forward | GTGGACACTCAGGAGAAGAACG  |
|       | reverse | TGCTGCTTAATAATCTTGCCCTT |
| FAK   | forward | AGTGGACCAGGAAATTGCTTTG  |
|       | reverse | GTGTTTTGGCCTTGACAGAATC  |
| GAPDH | forward | GCACCGTCAAGGCTGAGAAC    |
|       | reverse | TGGTGAAGACGCCAGTGGA     |

**Supplementary table 6.** A list of primers used in the reactions for ChIP assay.

| Gene name |         | Sequence (5' – 3')       |
|-----------|---------|--------------------------|
| SRC-P1    | forward | ACCGCAAGAGCTACCATTCA     |
|           | reverse | GGGTGGACAAGTCGATCAGC     |
| SRC-P2    | forward | CCAGGGAATAGAAGCCTGACC    |
|           | reverse | GACTCCCCTCTTACCCCCTG     |
| SRC-P3    | forward | TTACTTACTTGGAAGTGTGACTGC |
|           | reverse | TTTCTCAAAGTAGGGGCTGGG    |
| SRC-P4    | forward | AATCGTGATTTCTGGGAGAGGC   |
|           | reverse | CGGTGACCCGGGAGAGAC       |
| SRC-P5    | forward | GCCTGGGAGCCGGAG          |
|           | reverse | GCCTGGGAGCCGGAG          |
| SRC-P6    | forward | TGAAATCTGAGCCAGTCGGC     |
|           | reverse | GGGAGACCAAACGCAGTCT      |
| SRC-P7    | forward | CGGCTCAGAAGTTGGCAAAG     |
|           | reverse | ACCTGCCACCAATGAGGAAC     |
| SRC-P8    | forward | ACTGCCCCTCTAAGTCCCTA     |
|           | reverse | ACTAGCCAGCAACCTCACAT     |
